# Supplementary material
Source: publisher figshare collection journal article supplement (https://acs.figshare.com/ndownloader/files/28965606)
Supplement: Supplementary file 1 [file 28965606]

## Supporting Information

# Complex Phase Behavior in Particle-Forming AB/AB' Diblock Copolymer Blends with Variable Core Block Lengths

Aaron P. Lindsay,<sup>1</sup> Guo Kang Cheong,<sup>1</sup> Austin J. Peterson,<sup>1</sup> Steven Weigand,<sup>3</sup>  
Kevin D. Dorfman,<sup>1</sup> Timothy P. Lodge,<sup>1,2</sup> Frank S. Bates\*<sup>1</sup>

<sup>1</sup>Department of Chemical Engineering and Materials Science and <sup>2</sup>Department of Chemistry,  
University of Minnesota, Minneapolis, MN 55455, USA

<sup>3</sup>DND-CAT Synchrotron Research Center, Northwestern University, APS/ANL Building 432-  
A004, 9700 South Cass Ave, Argonne, Illinois 60439, USA

\*Corresponding Author: Frank S. Bates (bates001@umn.edu)

| <b>Contents</b>                                                                                    | <b>Page</b> |
|----------------------------------------------------------------------------------------------------|-------------|
| <b>Figure S1.</b> SEC data                                                                         | S3          |
| <b>Figure S2.</b> Extended 1D SAXS trace for C14 Laves phase in a SB1/SB2 blend                    | S3          |
| <b>Table S1.</b> Indexing and residuals for C14 Laves phase in a SB1/SB2 blend                     | S4          |
| <b>Table S2.</b> Indexing and residuals for $\sigma$ phase in a SB3/SB4 blend                      | S5          |
| <b>Figure S3.</b> 1D SAXS trace for a SB3/SB4 blend with $\phi_2 = 0.80$ at 180 °C                 | S6          |
| <b>Figure S4.</b> SAXS data collected for SB3/SB5 blends at 120 °C                                 | S6          |
| <b>Figure S5.</b> 1D SAXS traces collected for SB3/SB5 blends with $\phi_2 = 0.31$                 | S7          |
| <b>Figure S6.</b> TEM micrograph collected from a SB3/SB5 blend with $\phi_2 = 0.31$               | S8          |
| <b>Figure S7.</b> 1D SAXS trace for a HCP phase in a SB3/SB5 blend                                 | S9          |
| <b>Figure S8</b> 1D SAXS trace for a $\sigma$ /HCP coexistence in a SB3/SB5 blend                  | S9          |
| <b>Table S3.</b> Indexing and residuals for a $\sigma$ /HCP coexistence in a SB3/SB5 blend         | S10         |
| <b>Figure S9</b> 1D SAXS trace for an A15/ $\sigma$ coexistence in a SB3/SB5 blend                 | S11         |
| <b>Table S4.</b> Indexing and residuals for an A15/ $\sigma$ coexistence in a SB3/SB5 blend        | S12         |
| <b>Table S5.</b> Indexing and residuals for a QC in a SB3/SB5 blend                                | S13         |
| <b>Table S6.</b> Indexing and residuals for an A15/HEX <sub>C</sub> coexistence in a SB3/SB5 blend | S13         |
| <b>Calculation of mean particle radii</b>                                                          | S14         |
| <b>Dispersity</b>                                                                                  | S17         |
| <b>Self-consistent mean field theory (SCFT)</b>                                                    | S19         |
| <b>Figure S10.</b> Free energy profiles as a function of composition                               | S20         |
| <b>Figure S11.</b> Free energy profiles as a function of $\chi N$                                  | S20         |
| <b>Figure S12.</b> SCFT phase portrait at increased $\chi N$                                       | S21         |
| <b>Figure S13.</b> SCFT-derived composition maps for the $\sigma$ and A15 phases                   | S22         |
| <b>References</b>                                                                                  | S23         |

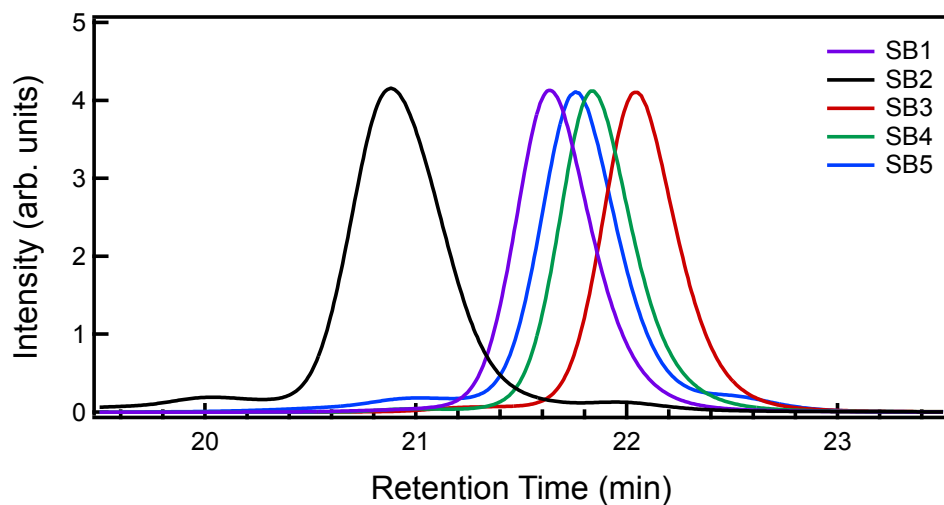

**Figure S1.** Size exclusion chromatography light scattering traces collected in tetrahydrofuran.

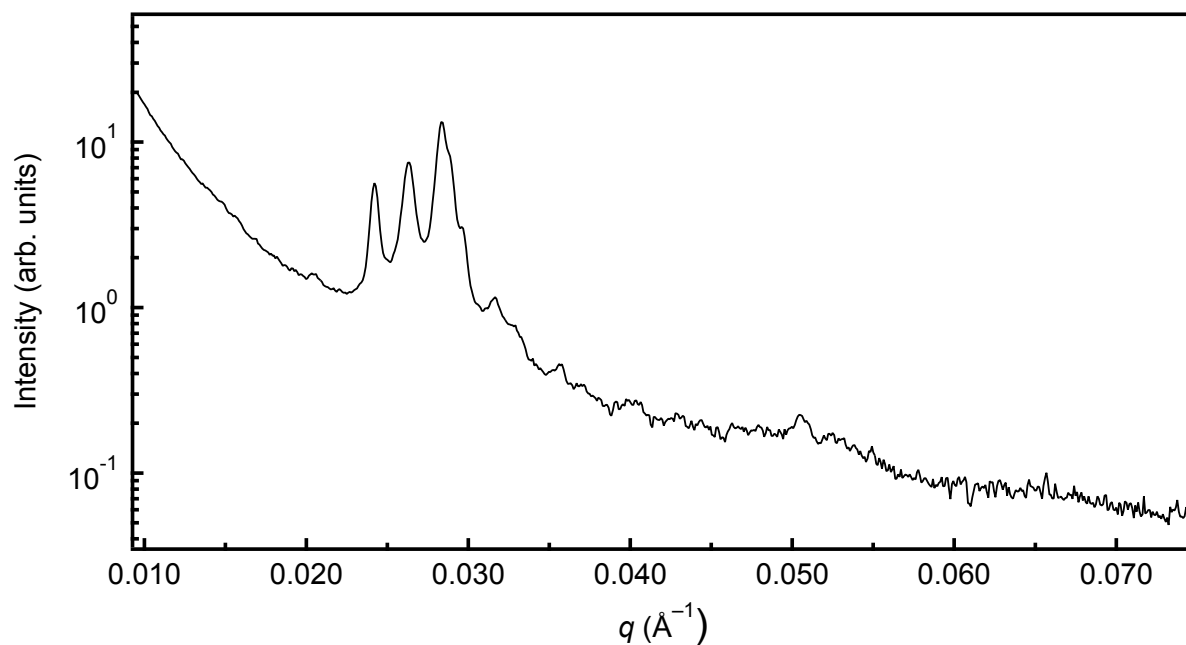

**Figure S2.** Extended 1D SAXS trace for the C14 Laves phase observed in SB1/SB2 blends with  $\phi_2 = 0.075$  at 150 °C following the thermal processing outlined in Figure 2 and the main text. Indexing and residuals can be found in Table S1.

**Table S1.** Observed and calculated peak positions for the C14 Laves phase in Figures 2 and S2; data were collected from SB1/SB2 blends with  $\phi_2 = 0.075$  at 150 °C. Peak positions were calculated as  $q_{hkl} = 2\pi [(4/3) (h^2 + hk + k^2)/a^2 + l^2/c^2]^{1/2}$  based on  $P6_3/mmc$  space group symmetry with lattice parameters  $a = 520.0$  Å and  $c = 847.5$  Å.

| Miller Indices<br>( <i>hkl</i> ) | $q_{\text{obs}}$<br>(1/Å) | $q_{\text{calc}}$<br>(1/Å) | % Residual<br>( $\Delta q / q_{\text{calc}} \times 100$ ) |
|----------------------------------|---------------------------|----------------------------|-----------------------------------------------------------|
| (100)                            | 0.013948                  | 0.013952                   | 0.03                                                      |
| (002)                            | 0.014846                  | 0.014827                   | −0.13                                                     |
| (101)                            | 0.015744                  | 0.015800                   | 0.35                                                      |
| (102)                            | 0.020325                  | 0.020359                   | 0.17                                                      |
| (110)                            | 0.024188                  | 0.024166                   | −0.09                                                     |
| (103)                            | 0.026292                  | 0.026254                   | −0.14                                                     |
| (200)                            | —                         | 0.027905                   | —                                                         |
| (112)                            | 0.028319                  | 0.028352                   | 0.12                                                      |
| (201)                            | 0.028858                  | 0.028873                   | 0.05                                                      |
| (004)                            | 0.029577                  | 0.029653                   | 0.26                                                      |
| (202)                            | 0.031643                  | 0.031599                   | −0.14                                                     |
| (104)                            | 0.032900                  | 0.032772                   | −0.39                                                     |
| (203)                            | 0.035685                  | 0.035683                   | −0.01                                                     |
| (210)                            | 0.036942                  | 0.036914                   | −0.07                                                     |

**Table S2.** Observed and calculated peak positions for the  $\sigma$  phase coexisting with  $\text{HEX}_C$  in Figures 3 and 4. Data were collected from an SB3/SB4 blend with  $\phi_2 = 0.80$  at 150 °C. Peak positions were calculated as  $q_{\text{hkl}} = 2\pi [(h^2 + hk + k^2)/a^2 + l^2/c^2]^{1/2}$  based on  $P4_2/mnm$  space group symmetry with lattice parameters  $a = 917.8 \text{ \AA}$  and  $c = 484.9 \text{ \AA}$ .

| Miller Indices<br>( <i>hkl</i> ) | $q_{\text{obs}}$<br>(1/Å) | $q_{\text{calc}}$<br>(1/Å) | % Residual<br>( $\Delta q/q_{\text{calc}} \times 100$ ) |
|----------------------------------|---------------------------|----------------------------|---------------------------------------------------------|
| (110)                            | —                         | 0.009682                   | —                                                       |
| (200)                            | —                         | 0.013692                   | —                                                       |
| (101)                            | —                         | 0.014654                   | —                                                       |
| (210)                            | —                         | 0.015308                   | —                                                       |
| (111)                            | —                         | 0.016174                   | —                                                       |
| (220)                            | —                         | 0.019363                   | —                                                       |
| (211)                            | 0.020048                  | 0.020055                   | 0.04                                                    |
| (310)                            | 0.021753                  | 0.021649                   | −0.48                                                   |
| (221)                            | 0.023369                  | 0.023298                   | −0.30                                                   |
| (301)                            | 0.024267                  | 0.024283                   | 0.07                                                    |
| (320)                            | 0.024626                  | 0.024684                   | 0.23                                                    |
| (311)                            | 0.025255                  | 0.025230                   | −0.10                                                   |
| (002)                            | 0.025917                  | 0.025913                   | −0.02                                                   |
| (400)                            | 0.027320                  | 0.027384                   | 0.23                                                    |
| (112)                            | —                         | 0.027663                   | —                                                       |
| (321)                            | 0.027858                  | 0.027877                   | 0.07                                                    |
| (410)                            | 0.028217                  | 0.028227                   | 0.03                                                    |
| (330)                            | 0.029025                  | 0.029045                   | 0.07                                                    |
| (202)                            | 0.029295                  | 0.029308                   | 0.04                                                    |
| (212)                            | —                         | 0.030097                   | —                                                       |
| (420)                            | —                         | 0.030616                   | —                                                       |
| (411)                            | 0.03109                   | 0.031058                   | −0.10                                                   |
| (331)                            | 0.031809                  | 0.031804                   | −0.02                                                   |
| (222)                            | 0.032347                  | 0.032348                   | 0.00                                                    |
| (421)                            | 0.033155                  | 0.033245                   | 0.27                                                    |
| (312)                            | 0.033694                  | 0.033766                   | 0.21                                                    |
| (430)                            | —                         | 0.034230                   | —                                                       |
| (510)                            | —                         | 0.034908                   | —                                                       |
| (322)                            | 0.035849                  | 0.035788                   | −0.17                                                   |
| (501)                            | 0.036657                  | 0.036600                   | −0.16                                                   |
| (520)                            | —                         | 0.036867                   | —                                                       |
| (511)                            | 0.037195                  | 0.037235                   | 0.11                                                    |

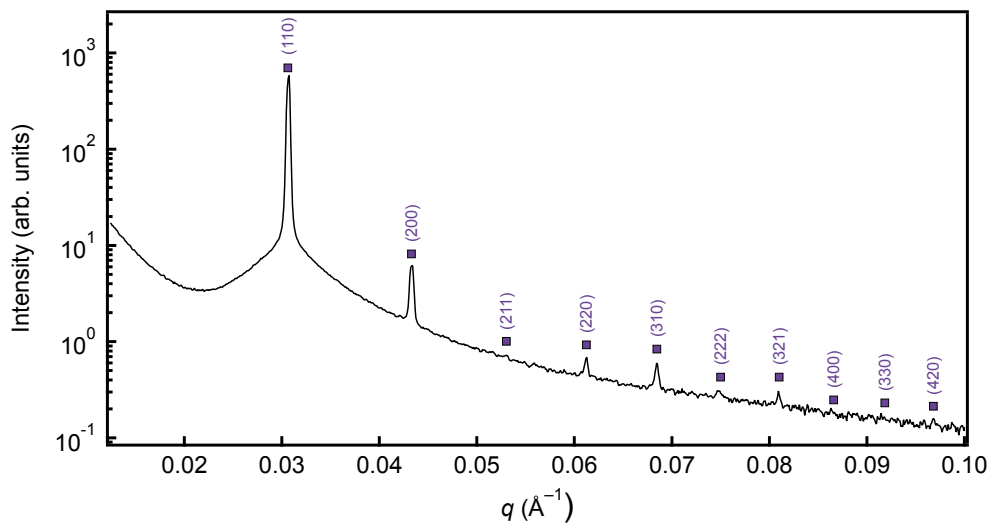

**Figure S3.** 1D SAXS trace collected from a SB3/SB4 blend with  $\phi_2 = 0.80$  following a 169 h anneal at 180 °C. The trace is indexed to a BCC phase.

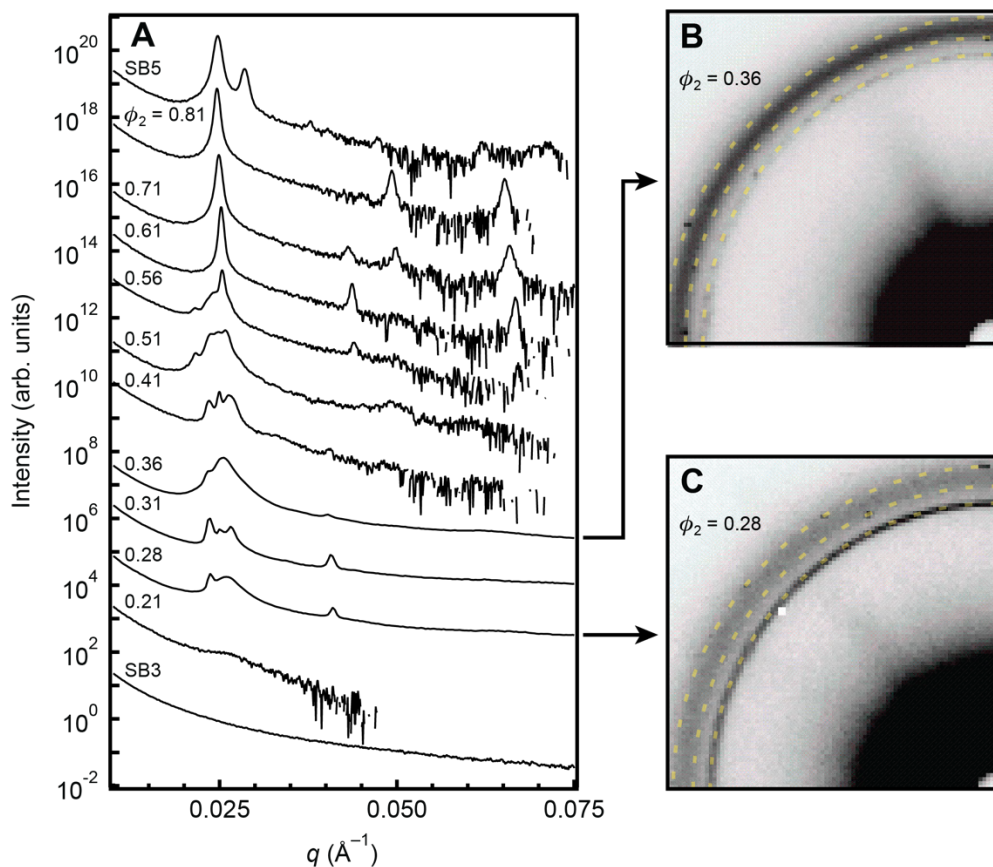

**Figure S4.** (A) 1D and (B,C) 2D SAXS data collected from SB3/SB5 blends following extended annealing (66-92 h) at 120 °C. 2D SAXS data in B and C was collected following 92 h of annealing at 120 °C. 2D data is indexed to the HCP phase (yellow dashed lines).

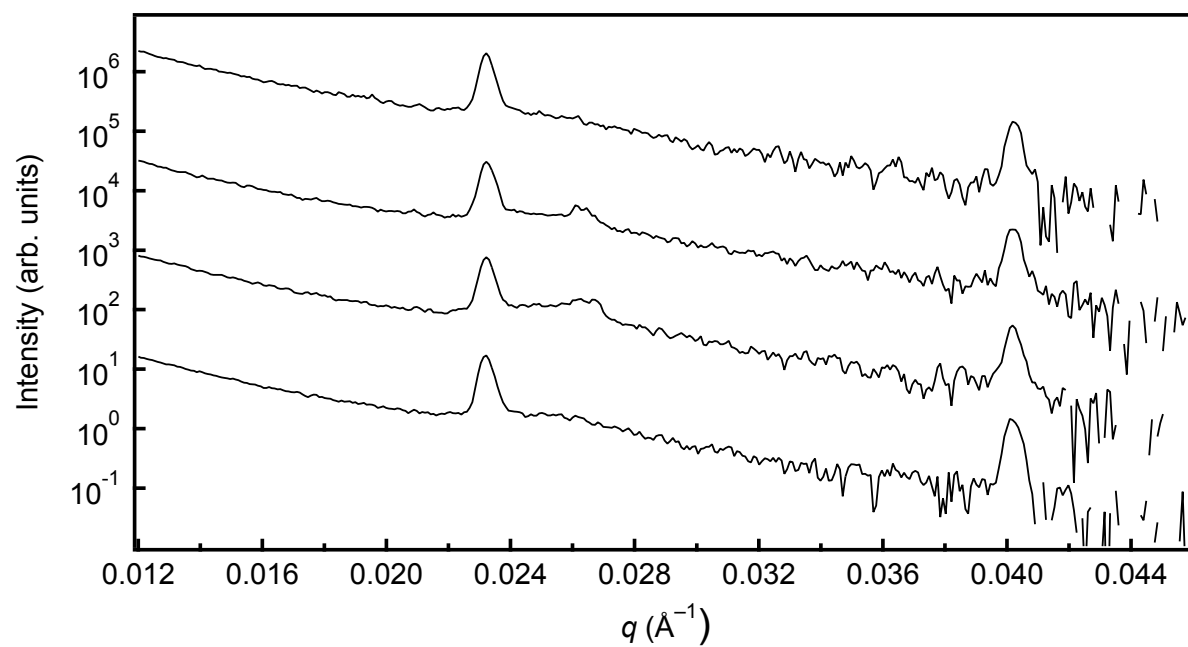

**Figure S5.** 1D SAXS traces collected from different locations on a SB3/SB5 blend with  $\phi_2 = 0.31$  following 66 h of annealing at 150 °C.

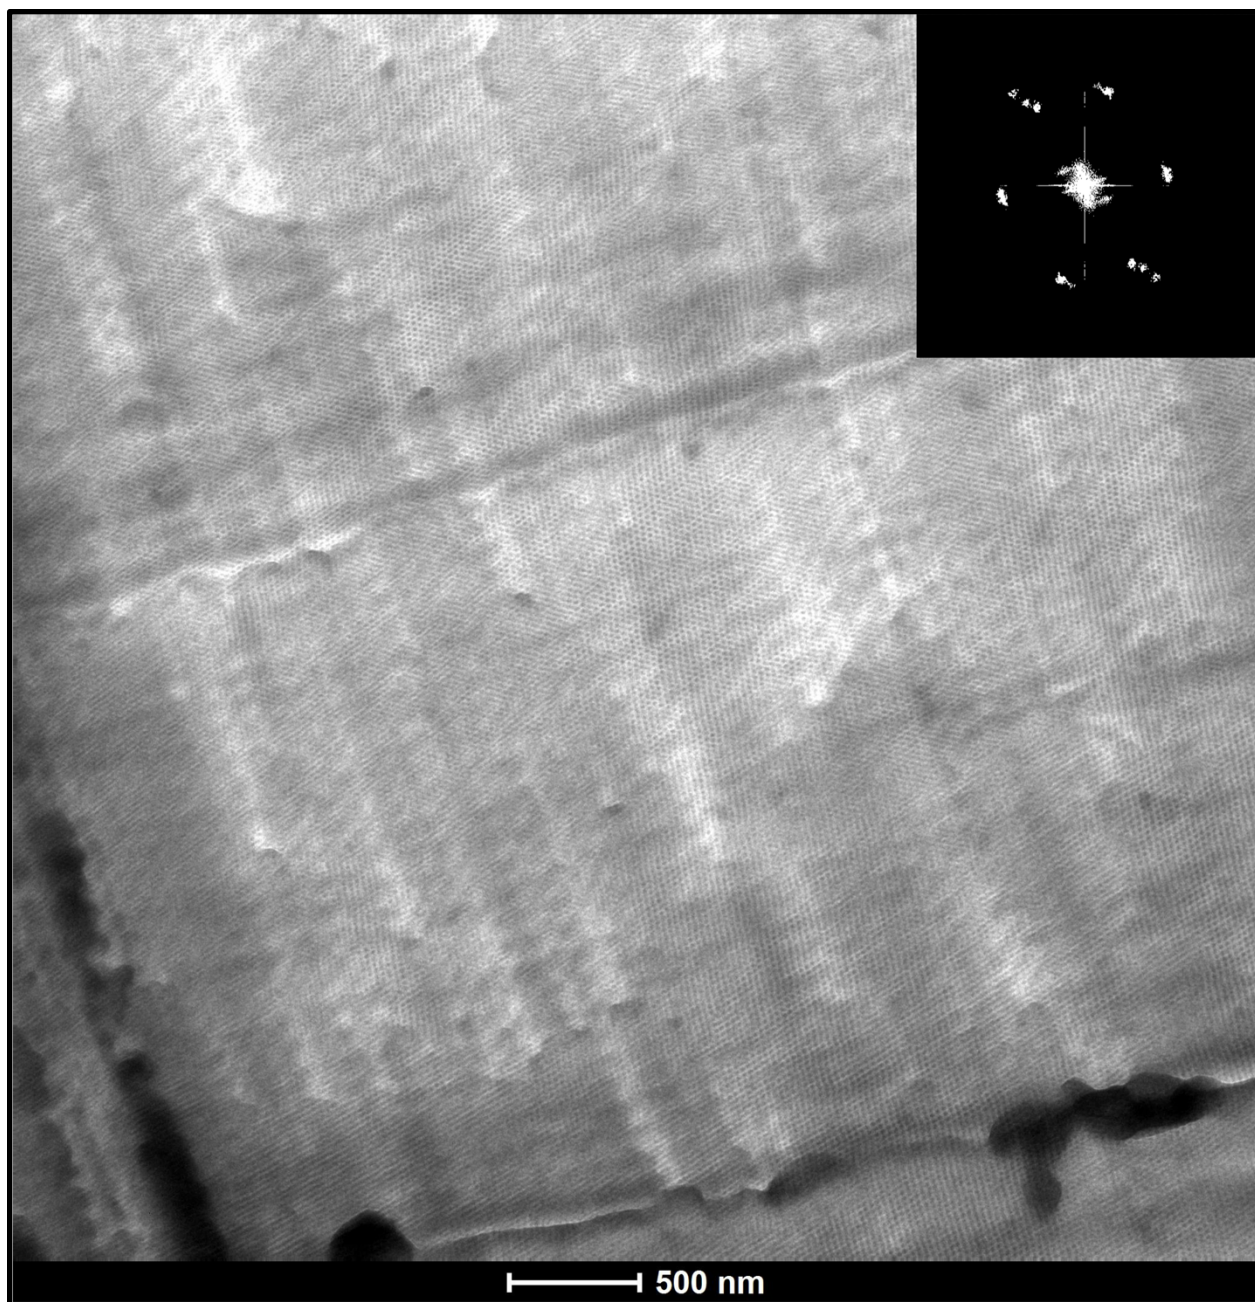

**Figure S6.** Transmission electron microscopy (TEM) micrograph collected from a thin ( $\sim 70$  nm) microtomed section of a SB3/SB5 blend with  $\phi_2 = 0.31$ . Prior to microtoming, the sample was annealed for 66 h at 150 °C, after which the SAXS patterns in Figures 5A,C and S5 were collected and the sample was vitrified in liquid nitrogen. The inset in the upper right corner is a Fourier transform of the image displaying the 6-fold rotation symmetry present over large areas.



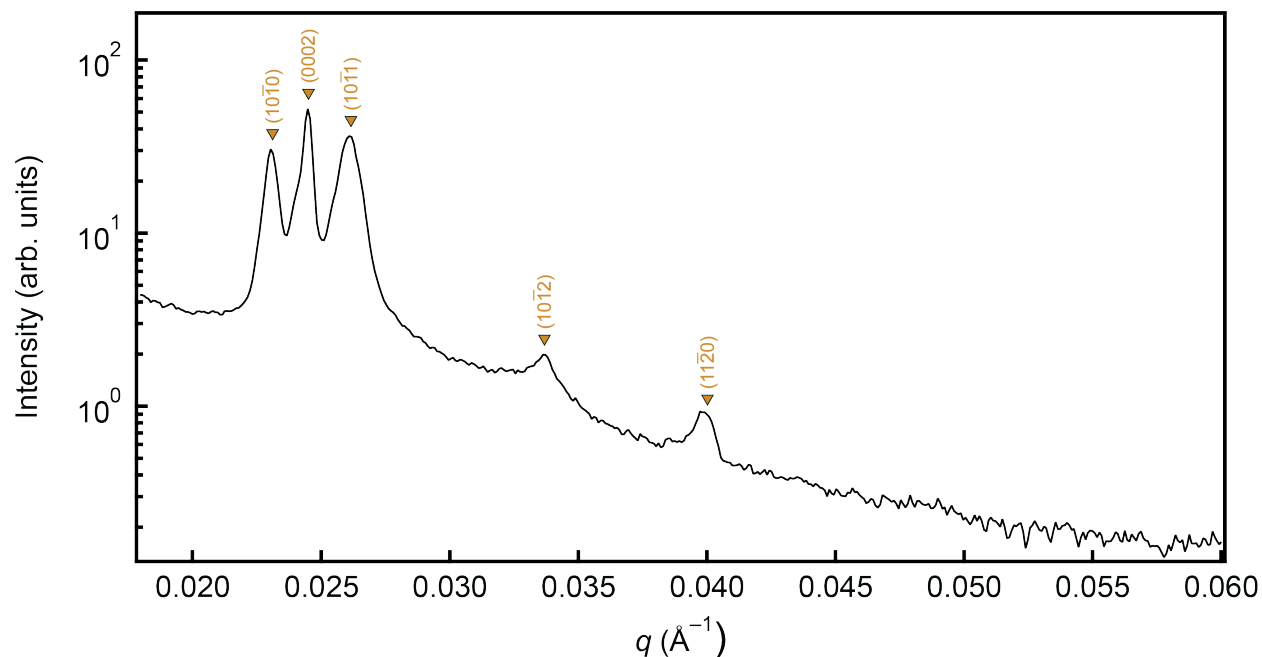

**Figure S7.** 1D SAXS trace collected from a SB3/SB5 blend with  $\phi_2 = 0.41$  following 92 h of annealing at 180 °C. The trace is indexed to a HCP phase. Additional patterns can be found in Figures 5 and S9. Indexing and residuals can be found in Table S4.

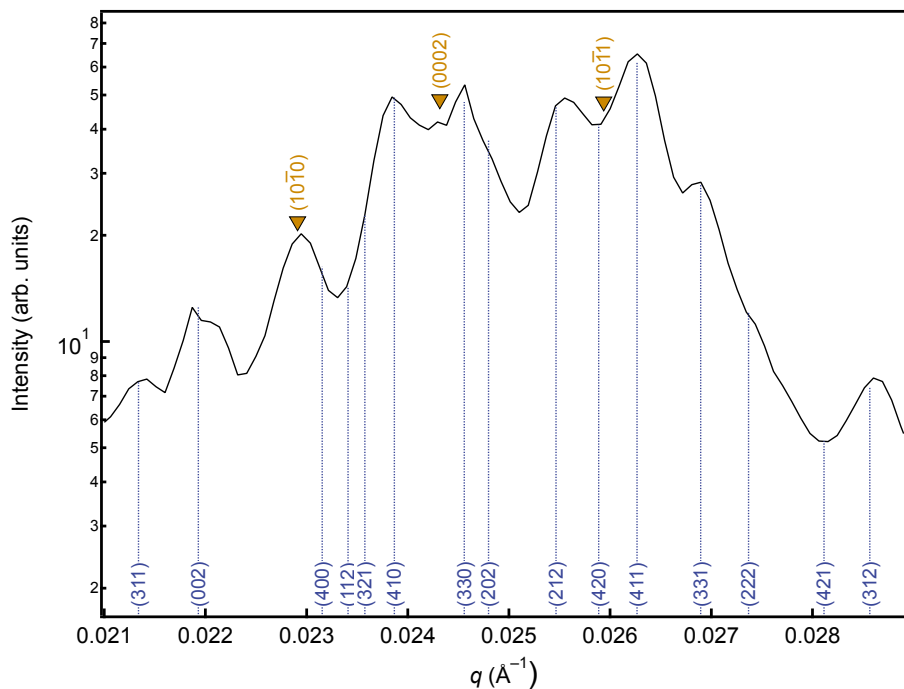

**Figure S8.** 1D SAXS trace collected from a SB3/SB5 blend with  $\phi_2 = 0.46$  after annealing at 180 °C for 66 h. Lines and inverted triangles denote peaks associated with the  $\sigma$  and HCP phases, respectively. Indexing and residuals can be found in Table S3.

**Table S3.** Observed and calculated peak positions for the  $\sigma$ /HCP phase coexistence evidenced in Figures 5 and S10; data were collected from SB3/SB5 blends with  $\phi_2 = 0.46$  at 180 °C. Peak positions for the HCP phase were calculated as  $q_{hkl} = 2\pi [(4/3) (h^2 + hk + k^2)/a^2 + l^2/c^2]^{1/2}$  based on  $P6_3/mmc$  space group symmetry with lattice parameters  $a = 316.7 \text{ \AA}$  and  $c = 517.1 \text{ \AA}$ . Peak positions for the  $\sigma$  phase were calculated as  $q_{hkl} = 2\pi [(h^2 + k^2)/a^2 + l^2/c^2]^{1/2}$  based on  $P4_2/mnm$  space group symmetry with lattice parameters  $a = 1085.5 \text{ \AA}$  and  $c = 573.0 \text{ \AA}$ .

| Miller Indices<br>( <i>hkl</i> ) or ( <i>hkl</i> ) | $q_{\text{obs}}$<br>(1/Å) | $q_{\text{calc}}$<br>(1/Å) | % Residual<br>( $\Delta q / q_{\text{calc}} \times 100$ ) |
|----------------------------------------------------|---------------------------|----------------------------|-----------------------------------------------------------|
| <b>HCP</b>                                         |                           |                            |                                                           |
| (10 $\bar{1}$ 0)                                   | 0.022946                  | 0.022910                   | −0.16                                                     |
| (0002)                                             | 0.024293                  | 0.024300                   | 0.03                                                      |
| (10 $\bar{1}$ 1)                                   | —                         | 0.025933                   | −0.26                                                     |
| (10 $\bar{1}$ 2)                                   | 0.033539                  | 0.033397                   | −0.43                                                     |
| (11 $\bar{2}$ 0)                                   | 0.039643                  | 0.039682                   | 0.10                                                      |
| (10 $\bar{1}$ 3)                                   | —                         | 0.043052                   | —                                                         |
| (20 $\bar{2}$ 0)                                   | 0.046016                  | 0.045820                   | −0.43                                                     |
| (11 $\bar{2}$ 2)                                   | 0.046555                  | 0.046531                   | −0.05                                                     |
| (20 $\bar{2}$ 1)                                   | 0.047363                  | 0.047404                   | 0.09                                                      |
| (0004)                                             | 0.048799                  | 0.048599                   | −0.41                                                     |
| (20 $\bar{2}$ 2)                                   | 0.051761                  | 0.051865                   | 0.20                                                      |
| <b><math>\sigma</math></b>                         |                           |                            |                                                           |
| (211)                                              | 0.016932                  | 0.016964                   | 0.19                                                      |
| (310)                                              | 0.018279                  | 0.018304                   | 0.14                                                      |
| (221)                                              | 0.019625                  | 0.019705                   | 0.40                                                      |
| (301)                                              | 0.020613                  | 0.020537                   | −0.37                                                     |
| (320)                                              | —                         | 0.020870                   | —                                                         |
| (311)                                              | 0.021331                  | 0.021337                   | 0.03                                                      |
| (002)                                              | 0.021959                  | 0.021931                   | −0.13                                                     |
| (400)                                              | —                         | 0.023153                   | —                                                         |
| (112)                                              | —                         | 0.023409                   | —                                                         |
| (321)                                              | —                         | 0.023575                   | —                                                         |
| (410)                                              | 0.023844                  | 0.023866                   | 0.09                                                      |
| (330)                                              | 0.024562                  | 0.024558                   | −0.02                                                     |
| (202)                                              | 0.024832                  | 0.024799                   | −0.13                                                     |
| (212)                                              | 0.02555                   | 0.025465                   | −0.33                                                     |
| (420)                                              | —                         | 0.025886                   | —                                                         |
| (411)                                              | 0.026268                  | 0.026264                   | −0.01                                                     |
| (331)                                              | 0.026896                  | 0.026895                   | −0.01                                                     |

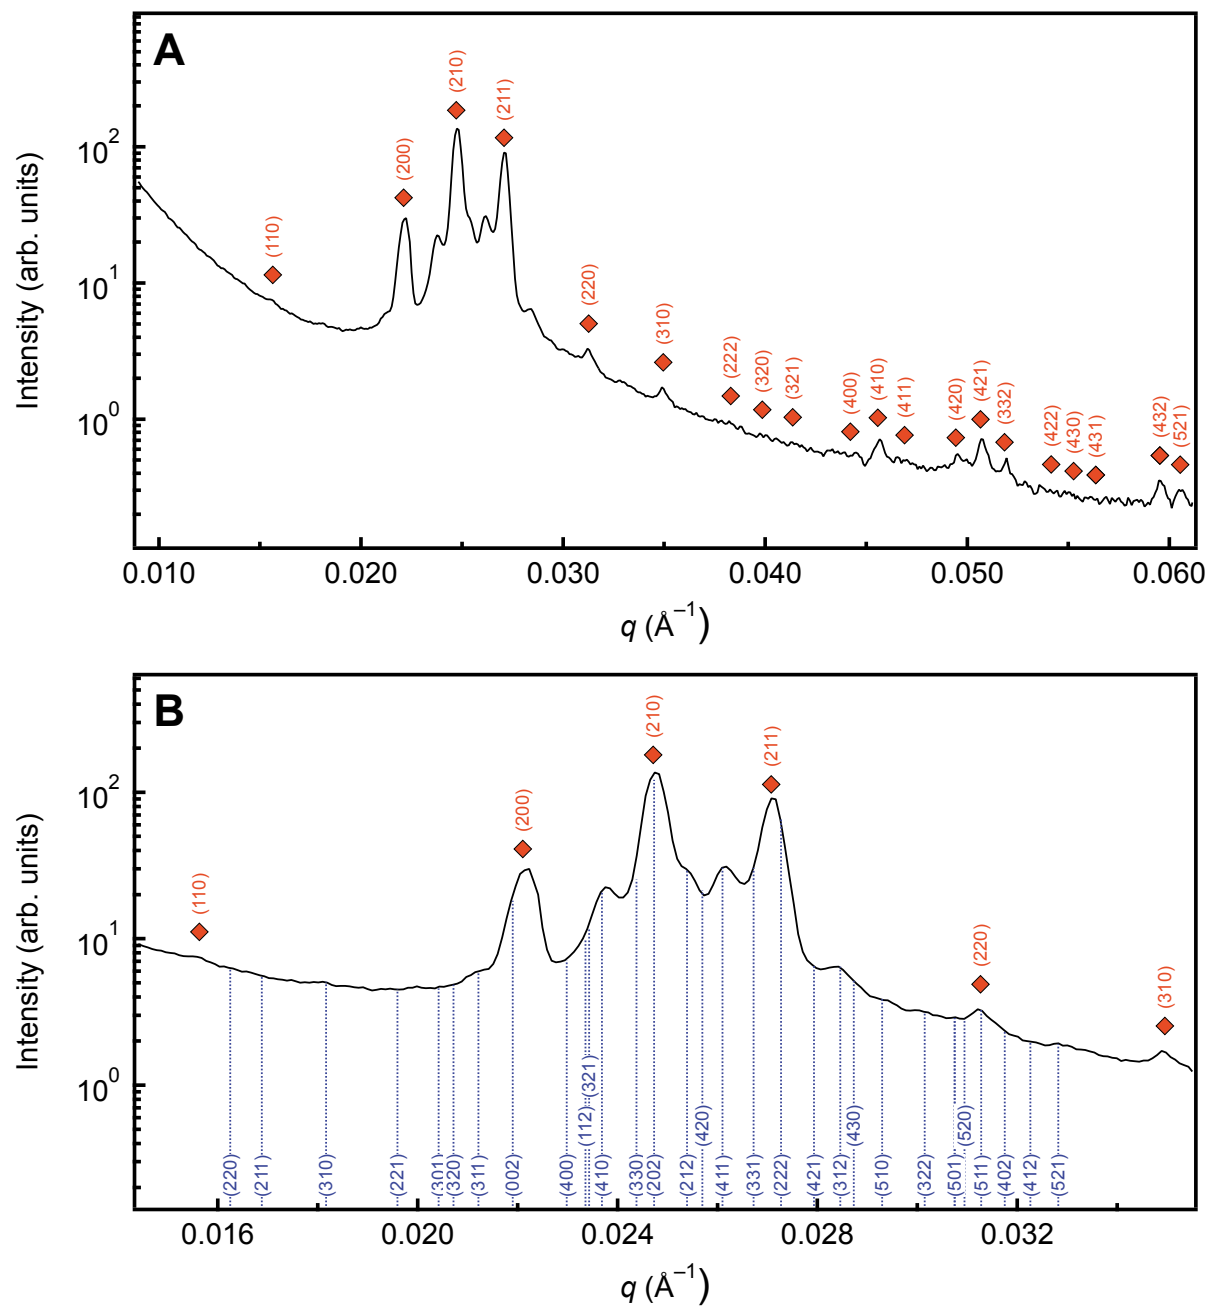

**Figure S9.** 1D SAXS trace collected from a SB3/SB5 blend with  $\phi_2 = 0.51$  after annealing at 180 °C for 66 h. Lines and diamonds denote peaks associated with  $\sigma$  and A15 phases, respectively. Indexing and residuals can be found in Table S6.

**Table S4.** Observed and calculated peak positions for the A15/ $\sigma$  phase coexistence evidenced in Figures 5 and S11; data were collected from SB3/SB5 blends with  $\phi_2 = 0.51$  at 180 °C. Peak positions for the A15 phase were calculated as  $q_{hkl} = 2\pi [(h^2 + k^2 + l^2) / a^2]^{1/2}$  based on  $Pm\bar{3}n$  space group symmetry with a lattice parameter of  $a = 568.5$  Å. Peak positions for the  $\sigma$  phase were calculated as  $q_{hkl} = 2\pi [(h^2 + k^2)/a^2 + l^2/c^2]^{1/2}$  based on  $P4_2/mnm$  space group symmetry with lattice parameters  $a = 1093.3$  Å and  $c = 573.7$  Å.

| Miller Indices<br>( <i>hkl</i> ) | $q_{obs}$<br>(1/Å) | $q_{calc}$<br>(1/Å) | % Residual<br>( $\Delta q / q_{calc} \times 100$ ) |
|----------------------------------|--------------------|---------------------|----------------------------------------------------|
| <b>A15</b>                       |                    |                     |                                                    |
| (110)                            | 0.015586           | 0.015630            | 0.28                                               |
| (200)                            | 0.022228           | 0.022104            | −0.56                                              |
| (210)                            | 0.024742           | 0.024713            | −0.12                                              |
| (211)                            | 0.027165           | 0.027072            | −0.34                                              |
| (220)                            | 0.031205           | 0.031260            | 0.18                                               |
| (310)                            | 0.034885           | 0.034950            | 0.19                                               |
| (222)                            | 0.038207           | 0.038285            | 0.20                                               |
| (320)                            | 0.039733           | 0.039849            | 0.29                                               |
| (321)                            | 0.041348           | 0.041353            | 0.01                                               |
| (400)                            | 0.0444             | 0.044208            | −0.43                                              |
| (410)                            | 0.045657           | 0.045569            | −0.19                                              |
| (411)                            | 0.047004           | 0.046890            | −0.24                                              |
| (420)                            | 0.049517           | 0.049426            | −0.18                                              |
| (421)                            | 0.050684           | 0.050647            | −0.07                                              |
| (332)                            | 0.051941           | 0.051839            | −0.20                                              |
| <b><math>\sigma</math></b>       |                    |                     |                                                    |
| (410)                            | 0.023754           | 0.023695            | −0.25                                              |
| (330)                            | —                  | 0.024382            | —                                                  |
| (202)                            | —                  | 0.024735            | —                                                  |
| (212)                            | 0.02546            | 0.025394            | −0.26                                              |
| (420)                            | —                  | 0.025701            | —                                                  |
| (411)                            | 0.026178           | 0.026103            | −0.29                                              |
| (331)                            | —                  | 0.026728            | —                                                  |
| (222)                            | —                  | 0.027275            | —                                                  |
| (421)                            | —                  | 0.027937            | —                                                  |
| (312)                            | 0.028422           | 0.028460            | 0.13                                               |
| (430)                            | —                  | 0.028734            | —                                                  |
| (510)                            | 0.02941            | 0.029303            | −0.36                                              |
| (322)                            | 0.030038           | 0.030150            | 0.37                                               |

**Table S5.** Observed and calculated peak positions for the QC evidenced in Figures 5 and S12; data were collected from SB3/SB5 blends with  $\phi_2 = 0.51$  at 150 °C. Peak positions were calculated as described by Iwami and Ishimasa [1] based on a  $P12_6/mmc$  space group symmetry, a tiling edge length  $a = 572.9$  Å, and a periodicity of  $c = 575.6$  Å.

| Miller Indices<br>( $a_1 a_2 a_3 a_4 a_5$ ) | $q_{\text{obs}}$<br>(1/Å) | $q_{\text{calc}}$<br>(1/Å) | % Residual<br>( $\Delta q / q_{\text{calc}} \times 100$ ) |
|---------------------------------------------|---------------------------|----------------------------|-----------------------------------------------------------|
| (11000)                                     | —                         | 0.012233                   | —                                                         |
| (00002)                                     | 0.021780                  | 0.021832                   | 0.24                                                      |
| (12100)                                     | 0.023844                  | 0.023633                   | −0.89                                                     |
| (01102)                                     | 0.024921                  | 0.025026                   | 0.42                                                      |
| (220 $\bar{1}$ 1)                           | 0.025999                  | 0.026032                   | 0.13                                                      |
| (11102)                                     | 0.028063                  | 0.027856                   | −0.74                                                     |
| (12202)                                     | —                         | 0.036531                   | —                                                         |
| (00004)                                     | 0.043664                  | 0.043664                   | 0.00                                                      |
| (01104)                                     | 0.045298                  | 0.045345                   | 0.10                                                      |

**Table S6.** Observed and calculated peak positions for the A15 phase coexisting with HEX<sub>C</sub> evidenced in Figures 5 and S13; data was collected from SB3/SB5 blends with  $\phi_2 = 0.56$  at 180 °C. Peak positions for the A15 phase were calculated as  $q_{\text{hkl}} = 2\pi [(h^2 + k^2 + l^2) / a^2]^{1/2}$  based on  $Pm\bar{3}n$  space group symmetry with a lattice parameter of  $a = 577.0$  Å.

| Miller Indices<br>( $hkl$ ) | $q_{\text{obs}}$<br>(1/Å) | $q_{\text{calc}}$<br>(1/Å) | % Residual<br>( $\Delta q / q_{\text{calc}} \times 100$ ) |
|-----------------------------|---------------------------|----------------------------|-----------------------------------------------------------|
| (110)                       | —                         | 0.015400                   | —                                                         |
| (200)                       | 0.021753                  | 0.021779                   | 0.12                                                      |
| (210)                       | 0.024357                  | 0.024349                   | −0.03                                                     |
| (211)                       | 0.026601                  | 0.026673                   | 0.27                                                      |
| (220)                       | —                         | 0.030800                   | —                                                         |

### Calculation of mean particle radii:

For a periodic particle packing, the mean particle radius  $\langle R \rangle$  can be calculated as:

$$\langle R \rangle = \left( \frac{3V_{UC}}{4\pi\rho_{P,UC}} \right)^{1/3} \quad (S1)$$

where  $V_{UC}$  is the unit cell volume, which can be readily determined *via* SAXS, and  $\rho_{P,UC}$  is the number of particles per unit cell set by the packing. In the most general form, unit cell volume can be calculated as:

$$V_{UC} = a b c (1 - \cos^2\alpha - \cos^2\beta - \cos^2\gamma + 2 \cos\alpha \cos\beta \cos\gamma)^{1/2} \quad (S2)$$

where  $a$ ,  $b$ , and  $c$  are lattice constants and the angles  $\alpha$ ,  $\beta$ , and  $\gamma$  are lattice parameters. These values are determined from SAXS from the relations:

$$q_{hkl,cubic} = 2\pi \left( \frac{(h^2 + k^2 + l^2)}{a^2} \right)^{1/2} \quad (S3)$$

$$q_{hkl,hexagonal} = 2\pi \left( \frac{4(h^2 + hk + k^2)}{3a^2} + \frac{l^2}{c^2} \right)^{1/2} \quad (S4)$$

$$q_{hkl,tetragonal} = 2\pi \left( \frac{(h^2 + k^2)}{a^2} + \frac{l^2}{c^2} \right)^{1/2} \quad (S5)$$

for cubic, hexagonal, or tetragonal lattices, where  $q_{hkl}$  is the scattering wavevector for plane  $(hkl)$ ,  $\alpha = \beta = \gamma = 90^\circ$  for a cubic or tetragonal lattice, and  $\alpha = \beta = 90^\circ$  and  $\gamma = 120^\circ$  for a hexagonal lattice.

From these relations,  $\langle R \rangle$  can be calculated for the phases observed in this work as:

$$\langle R \rangle_{BCC} = R_{BCC} = \frac{3^{1/3} 2^{1/2} \pi^{2/3}}{q_{110}} \quad (S6)$$

$$\langle R \rangle_{FCC} = R_{FCC} = \frac{3^{5/6} \pi^{2/3}}{2^{1/3} q_{111}} \quad (S7)$$

$$\langle R \rangle_{\text{HCP}} = R_{\text{HCP}} = \frac{2^{2/3} \pi^{2/3} (c/a)^{1/3}}{q_{10\bar{1}0}} \quad (\text{S8})$$

$$\langle R \rangle_{\sigma} = \frac{2\pi^{2/3}}{5^{1/3} (c/a)^{2/3} q_{002}} \quad (\text{S9})$$

$$\langle R \rangle_{\text{A15}} = \frac{3^{1/3} \pi^{2/3}}{2^{1/6} q_{110}} \quad (\text{S10})$$

$$\langle R \rangle_{\text{C14}} = \frac{2^{1/3} \pi^{2/3} (c/a)^{1/3}}{3^{1/3} q_{10\bar{1}0}} \quad (\text{S11})$$

Owing to a lack of translational symmetry,  $\langle R \rangle$  for a dodecagonal quasicrystal (QC) or a liquid-like packing (LLP) can only be estimated. For a QC, this is best done by taking the (00002) reflection as the  $\sigma$   $q_{002}$  peak owing to the close structural relationship between the two phases and the invariance of this reflection on transition to the  $\sigma$  phase.<sup>2,3</sup> For LLP the principal reflection can be taken as the  $q_{110}$  peak of the BCC phase by a similar argument. On calculating  $\langle R \rangle$ , the core radius can be calculated as:

$$\langle R_{\text{core}} \rangle = f_{\text{core}}^{1/3} \langle R \rangle \quad (\text{S12})$$

where  $f_{\text{core}}$  is volume fraction of the core domain assuming complete segregation of both blocks. This core radius can then be used to calculate the underlying spherical form factor.

A similar strategy can be used to calculate the radius of cylinders in the hexagonally-packed cylinder (HEX<sub>C</sub>) phase. However, the functional form changes slightly owing to periodicity in only two dimensions.  $\langle R \rangle$  is instead calculated as:

$$R_{\text{cyl}} = \left( \frac{A_{\text{UC}}}{\pi \rho_{\text{C,UC}}} \right)^{1/2} \quad (\text{S13})$$

where  $A_{UC}$  is the unit cell area, which can be readily determined *via* SAXS, and  $\rho_{C,UC} = 1$  is the number of cylinders per unit cell. The unit cell area can be calculated as:

$$A_{UC} = \frac{3^{1/2} a^2}{2} \quad (S14)$$

The lattice parameter  $a$  is determined from SAXS according to the relation:

$$q_{hk,hexagonal2D} = 2\pi \left( \frac{4(h^2 + hk + k^2)}{3a^2} \right)^{1/2} \quad (S15)$$

From these equations,  $\langle R \rangle$  can be calculated for the  $HEX_C$  phase as:

$$R_{cyl} = \frac{2^{3/2} \pi^{1/2}}{3^{1/4} q_{10}} \quad (S16)$$

On calculating  $R_{cyl}$ , the cylinder core radius can then be calculated as:

$$R_{core,cyl} = f_{core}^{1/2} R_{cyl} \quad (S17)$$

where  $f_{core}$  is again the volume fraction of the core domain assuming complete segregation of both blocks. This core radius can then be used to calculate the underlying cylindrical form factor.



## Dispersity:

Core block dispersity  $\bar{D} \approx 1.12$  was estimated for SB3/SB4 blends with  $\phi_2 = 0.80$  approximating the constituent diblock copolymers as monodisperse via the relation:

$$\bar{D} = \frac{M_w}{M_n} \quad (\text{S18})$$

where  $M_w$  and  $M_n$  are the weight- and number-average block molecular weights calculated as:

$$M_n = x_1 M_{n,1} + x_2 M_{n,2} \quad (\text{S19})$$

$$M_w = \frac{x_1 M_{n,1}^2 + x_2 M_{n,2}^2}{x_1 M_{n,1} + x_2 M_{n,2}} \quad (\text{S20})$$

where values of  $M_n$  for each block and polymer can be found in Table S1 and  $x_i$  is the mole fraction of copolymer  $i$  in the core domain. A similar approach can be used to estimate the dispersity of the corona as  $\bar{D} \approx 1.001$ . Notably, this approach only provides an estimate and neglects the dispersity of each polymer, each determined via size exclusion chromatography (SEC) to be  $\bar{D} \approx 1.01$ .

To compare this value with previously investigated 1,4-polyisoprene-*block*-poly( $\pm$ -lactide) (IL) diblock copolymers, we assume a I precursor dispersity of 1.06, a reasonable estimate for low molecular weight I synthesized *via* anionic polymerization,<sup>4</sup> and independent block dispersities. Using the rule for the sum of variances of statistical distributions (*i.e.*,  $\bar{D}_{\text{PIPLA}} = w_{\text{PI}}^2 (\bar{D}_{\text{PI}} - 1) + w_{\text{PLA}}^2 (\bar{D}_{\text{PLA}} - 1) + 1$ , where  $w_i$  is the mass fraction of block  $i$ ), it can be found that many of the  $\sigma$ -forming IL diblock copolymers reported in the literature likely had core (L) block dispersities greater than the  $\bar{D}_{\text{core}} = 1.2$  we found in this work to be sufficient to drive  $\sigma$ -formation.<sup>5–12</sup> It should be noted that the accuracy of such calculations is limited by that of the assumed I precursor dispersity and the resolution of the instruments used for dispersity measurements.<sup>13</sup> However, there are several reasons one might anticipate a higher dispersity for the second block. First, ring-opening polymerization of lactides generally results in higher dispersity ( $\sim 1.1$ – $2.0$ ) than anionic polymerization of isoprene ( $< 1.1$ ).<sup>5,14,15</sup> Second, it is anticipated that some fraction of PI precursor will be present in the final diblock copolymer due to a combination of early termination,

incomplete reinitiation, and challenges inherent to purification.<sup>13</sup> Third, when considering the low molecular weight of these polymers, generally characterized by an average block length of 45 isoprene and 6 lactide monomer units, it is clear that the loss or gain of only a few lactide monomer units over the course of the polymerization would have a dramatic effect on the block dispersity.

### Self-consistent mean-field theory (SCFT):

Calculations based on self-consistent mean-field theory were performed using the open-source Polymer Self-Consistent Field software package (PSCF).<sup>16</sup> We performed binary blend canonical ensemble calculations at  $N_2/N_1 = 1.4$ ,  $N_{B,1} = N_{B,2}$ ,  $f_{A,1} = 0.12$ ,  $f_{A,2} = 0.38$  and a conformational asymmetry of  $\varepsilon = b_B/b_S$  ( $v_S/v_B$ ) = 1.7. Note this differs modestly from experiments, where  $f_{A,2} = 0.388$ , but is within experimental error and, thus, has a negligible impact on the applicability of the calculations to the experimental results. We scanned a range of  $\chi N$  (20–30) and  $\phi_2$  (0–1), mimicking the parameter space explored experimentally. The candidate phases tested in the canonical ensemble calculations include the body-centered cubic (BCC), face-centered cubic (FCC), hexagonally close-packed (HCP), hexagonally-packed cylinder (HEX<sub>C</sub>), double gyroid (GYR), and disordered (DIS) phases as well as the Frank–Kasper (FK)  $\sigma$ , A15, C14, and C15 phases. SCFT calculations were performed using a grid size of  $64 \times 64 \times 64$  for the three-dimensional structures except for the  $\sigma$  and two-dimensional HEX<sub>C</sub> phases, which were performed at a grid size of  $96 \times 96 \times 48$  and  $64 \times 64$ , respectively. Calculations were performed with a contour length step size of  $\Delta s = 0.01$  and a convergence criterion of  $10^{-5}$  as defined by Arora *et al.*<sup>17</sup> As shown in Figure S10, the free energies were almost degenerate at  $\phi_2 = 0.15$  and 0.25. To better resolve the phase behavior at those compositions, we repeated the calculations using a more stringent convergence criterion of  $10^{-6}$ . Figure S11 shows the results under this stricter convergence criterion, revealing that C15 and HCP phases offer the lowest free energy at low  $\phi_2$ . Then, we performed grand canonical ensemble calculations between neighboring phases to resolve phase coexistence. Further calculation details can be found elsewhere.<sup>18</sup>

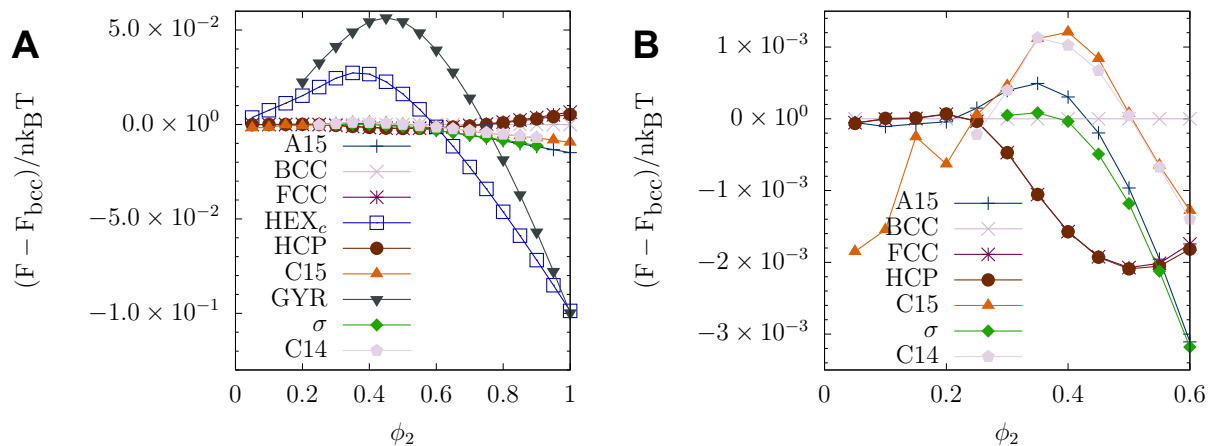

**Figure S10.** Normalized free energy relative to BCC *versus*  $\phi_2$  at  $\chi N = 28$  for (A) all studied phases and (B) only particle phases.

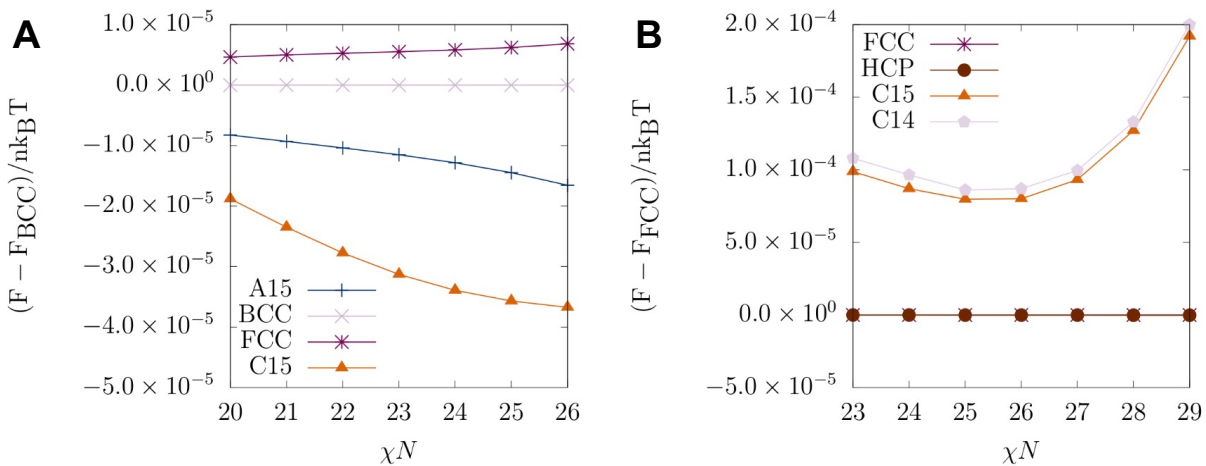

**Figure S11.** Normalized free energy relative to (A) BCC and (B) FCC *versus*  $\chi N$  at (A)  $\phi_2 = 0.15$  and (B)  $\phi_2 = 0.25$  for select phases under the more stringent convergence criterion of  $10^{-6}$ .

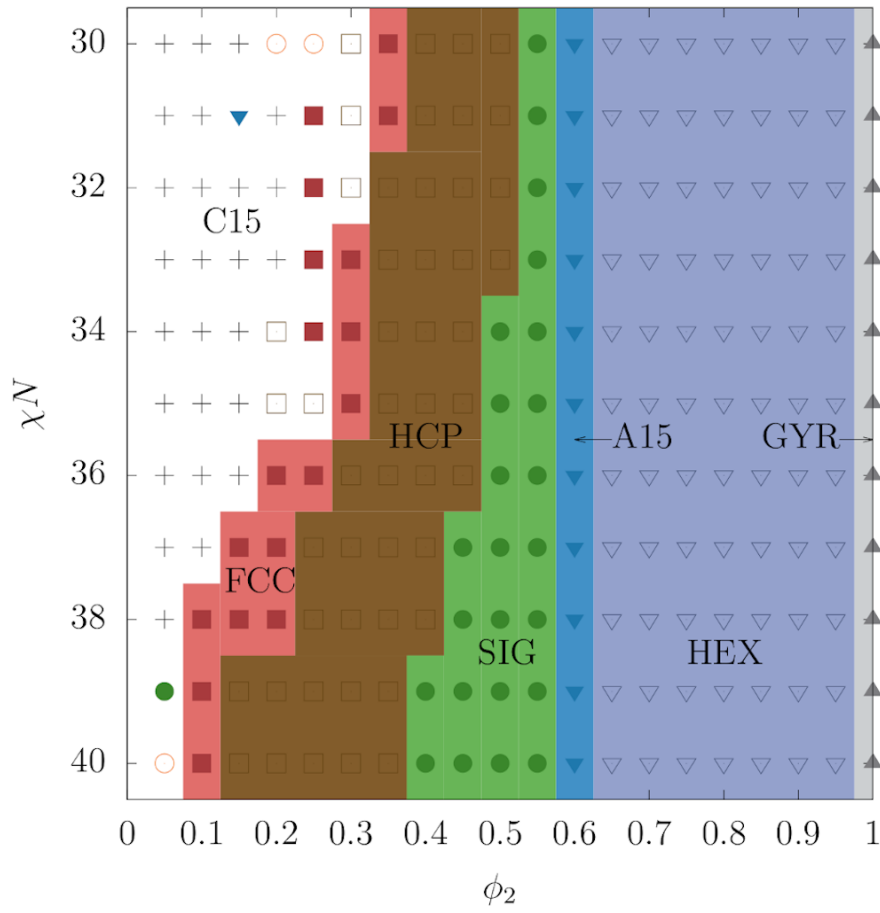

**Figure S12.** Binary blend phase diagram generated from canonical ensemble SCFT calculations over an extended range of  $\chi N$  ( $N_2/N_1 = 1.4$ ,  $N_{S,1} = N_{S,2}$ ,  $f_{B,1} = 0.12$ , and  $f_{B,2} = 0.38$ ). Symbols correspond to the double gyroid (gray ▲), hexagonally-packed cylinder (purple ▽), A15 (blue ▼),  $\sigma$  (green ●), hexagonal close-packed (□), face-centered cubic (red ■), C14 (orange o), and C15 phases (black +).

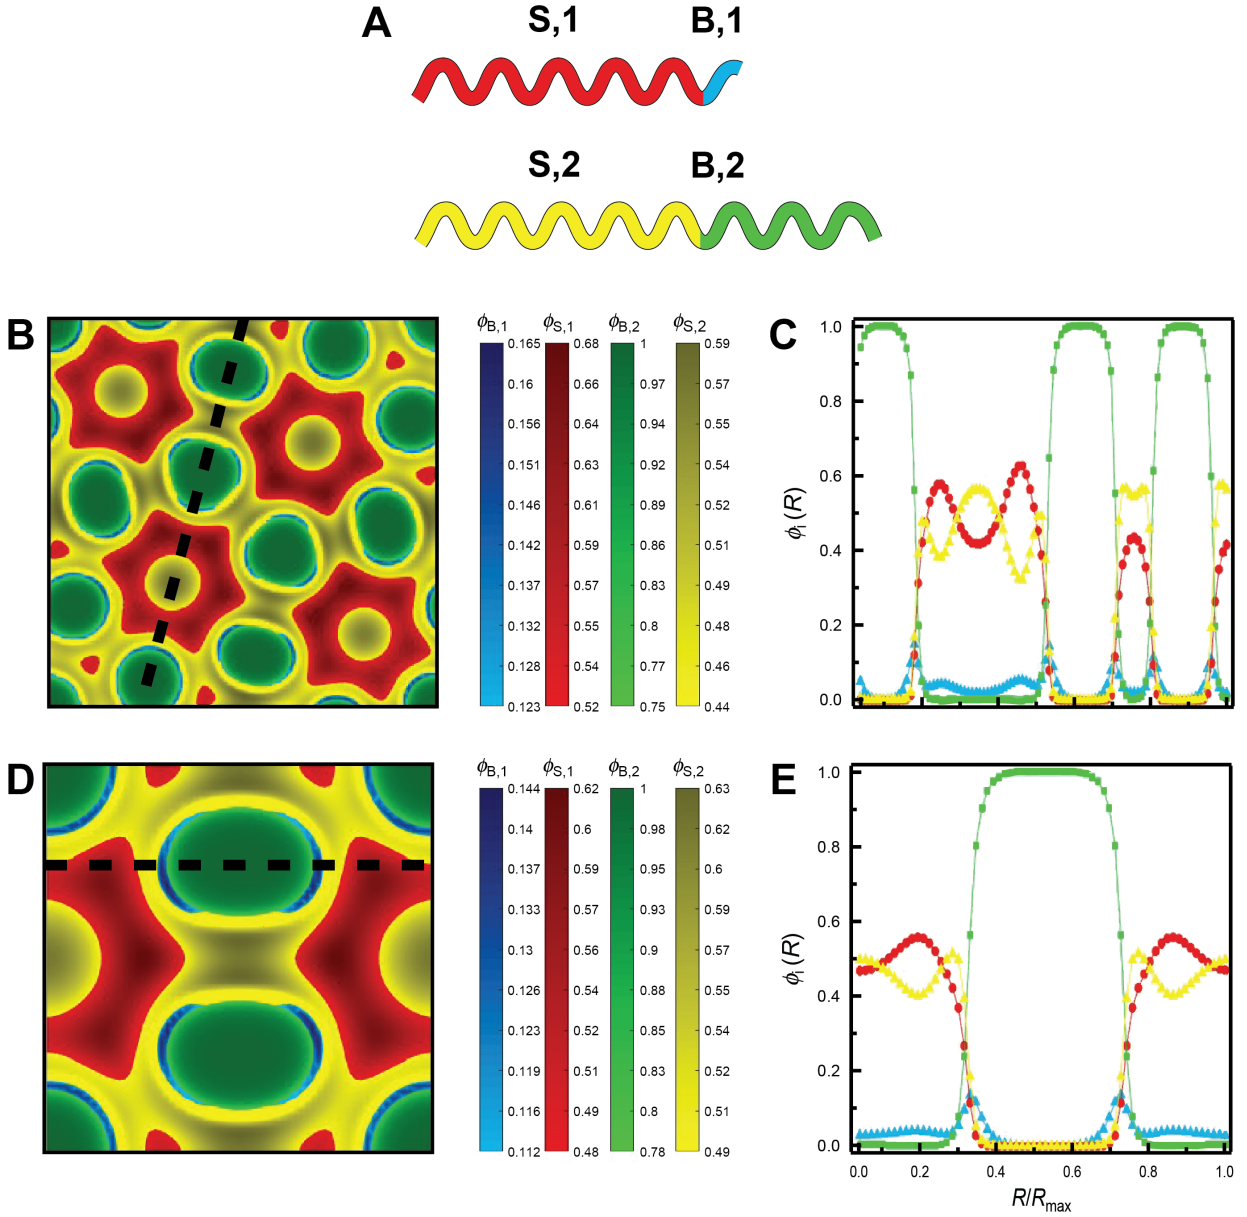

**Figure S13.** (B,D) Composition maps and (C,E) 1D composition profiles for the (B,C)  $\sigma$  and (D,E) A15 phases in the (001) planes. Data were calculated *via* SCFT for SB3/SB5 blends with (B,C)  $\phi_2 = 0.55$  and (D,E) 0.60 at  $\chi\langle N \rangle = 30$ .  $\phi_i$  is the volume fraction of block  $i$  at each position.  $R/R_{\max}$  is the nondimensional distance along the dashed lines in (B,D), where 0 corresponds to the (C) bottom or (E) left edge of the composition map. The schematic in (A) shows the relative copolymer block lengths. Blue and red shading correspond to the B and S blocks of SB3, whereas green and yellow shading correspond to the B and S blocks of SB5, respectively.

## References

- (1) Iwami, S.; Ishimasa, T. Dodecagonal Quasicrystal in Mn-Based Quaternary Alloys Containing Cr, Ni and Si. *Philos. Mag. Lett.* **2015**, *95*, 229–236.  
<https://doi.org/10.1080/09500839.2015.1038332>.
- (2) Lindsay, A. P.; Jayaraman, A.; Peterson, A. J.; Mueller, A. J.; Weigand, S.; Mahanthappa, M. K.; Lodge, T. P.; Bates, F. S. Reevaluation of Poly(Ethylene-Alt -Propylene)- Block - Polydimethylsiloxane Phase Behavior Uncovers Topological Close-Packing and Epitaxial Quasicrystal Growth. *ACS Nano* **2021**, *ASAP Article*.  
<https://doi.org/10.1021/acsnano.1c02420>.
- (3) Lindsay, A. P.; Lewis, R. M.; Lee, B.; Peterson, A. J.; Lodge, T. P.; Bates, F. S. A15,  $\sigma$ , and a Quasicrystal: Access to Complex Particle Packings via Bidisperse Diblock Copolymer Blends. *ACS Macro Lett.* **2020**, *9*, 197–203.  
<https://doi.org/10.1021/acsmacrolett.9b01026>.
- (4) Schmidt, S. C.; Hillmyer, M. A. Morphological Behavior of Model Poly(Ethylene-Alt-Propylene)-b-Polylactide Diblock Copolymers. *J. Polym. Sci. Part B Polym. Phys.* **2002**, *40*, 2364–2376. <https://doi.org/10.1002/polb.10291>.
- (5) Lynd, N. A.; Hillmyer, M. A. Influence of Polydispersity on the Self-Assembly of Diblock Copolymers. *Macromolecules* **2005**, *38*, 8803–8810. <https://doi.org/10.1021/ma051025r>.
- (6) Cooke, D. M.; Shi, A.-C. Effects of Polydispersity on Phase Behavior of Diblock Copolymers. *Macromolecules* **2006**, *39*, 6661–6671. <https://doi.org/10.1021/ma060717s>.
- (7) Lee, S.; Bluemle, M. J.; Bates, F. S. Discovery of a Frank-Kasper  $\sigma$  Phase in Sphere-Forming Block Copolymer Melts. *Science* **2010**, *330*, 349–353.  
<https://doi.org/10.1126/science.1195552>.
- (8) Gillard, T. M.; Lee, S.; Bates, F. S. Dodecagonal Quasicrystalline Order in a Diblock

- Copolymer Melt. *Proc. Natl. Acad. Sci. U. S. A.* **2016**, *113*, 5167–5172.  
<https://doi.org/10.1073/pnas.1601692113>.
- (9) Lee, S.; Leighton, C.; Bates, F. S. Sphericity and Symmetry Breaking in the Formation of Frank-Kasper Phases from One Component Materials. *Proc. Natl. Acad. Sci. U. S. A.* **2014**, *111*, 17723–17731. <https://doi.org/10.1073/pnas.1408678111>.
  - (10) Schulze, M. W.; Lewis, R. M.; Lettow, J. H.; Hickey, R. J.; Gillard, T. M.; Hillmyer, M. A.; Bates, F. S. Conformational Asymmetry and Quasicrystal Approximants in Linear Diblock Copolymers. *Phys. Rev. Lett.* **2017**, *118*, 207801.  
<https://doi.org/10.1103/PhysRevLett.118.207801>.
  - (11) Kim, K.; Arora, A.; Lewis, R. M.; Liu, M.; Li, W.; Shi, A. C.; Dorfman, K. D.; Bates, F. S. Origins of Low-Symmetry Phases in Asymmetric Diblock Copolymer Melts. *Proc. Natl. Acad. Sci. U. S. A.* **2018**, *115*, 847–854. <https://doi.org/10.1073/pnas.1717850115>.
  - (12) Kim, K.; Schulze, M. W.; Arora, A.; Lewis, R. M.; Hillmyer, M. A.; Dorfman, K. D.; Bates, F. S. Thermal Processing of Diblock Copolymer Melts Mimics Metallurgy. *Science* **2017**, *356*, 520–523. <https://doi.org/10.1126/science.aam7212>.
  - (13) Hiemenz, P. C.; Lodge, T. P. *Polymer Chemistry*, 2nd Editio.; CRC Press: Boca Raton, 2007.
  - (14) Dechy-Cabaret, O.; Martin-Vaca, B.; Bourissou, D. Controlled Ring-Opening Polymerization of Lactide and Glycolide. *Chem. Rev.* **2004**, *104*, 6147–6176.  
<https://doi.org/10.1021/CR040002S>.
  - (15) Schmidt, S. C.; Hillmyer, M. A. Synthesis and Characterization of Model Polyisoprene–Polylactide Diblock Copolymers. *Macromolecules* **1999**, *32*, 4794–4801.  
<https://doi.org/10.1021/MA9900277>.



- (16) Arora, A.; Qin, J.; Morse, D. C.; Delaney, K. T.; Fredrickson, G. H.; Bates, F. S.; Dorfman, K. D. Broadly Accessible Self-Consistent Field Theory for Block Polymer Materials Discovery. *Macromolecules* **2016**, *49*, 4675–4690.  
<https://doi.org/10.1021/acs.macromol.6b00107>.
- (17) Arora, A.; Morse, D. C.; Bates, F. S.; Dorfman, K. D. Accelerating Self-Consistent Field Theory of Block Polymers in a Variable Unit Cell. *J. Chem. Phys.* **2017**, *146*, 244902.  
<https://doi.org/10.1063/1.4986643>.
- (18) Liu, M.; Qiang, Y.; Li, W.; Qiu, F.; Shi, A. C. Stabilizing the Frank-Kasper Phases via Binary Blends of AB Diblock Copolymers. *ACS Macro Lett.* **2016**, *5*, 1167–1171.  
<https://doi.org/10.1021/acsmacrolett.6b00685>.
